# Supplementary material
Source: PubMed Central journal article supplement (PMC8363186)
Supplement: NIHMS1695527-supplement-1.pdf [file NIHMS1695527-supplement-1.pdf]

1 **Supplementary Table 1. Comparison of Cohort 2 symptom characteristics at**  
 2 **time of illness presentation for children with group A Streptococcus acute**  
 3 **infection and children with previous *emm*-type colonization and estimation of**  
 4 **odds ratio using two-sided Fisher's exact test.**

| Symptom Characteristics                   |                 | Acute Infection<br>n/N <sup>1</sup> | GAS <sup>2</sup> Carriers<br>with Established<br><i>emm</i> -type n/N | OR <sup>3</sup> (95% CI <sup>4</sup> ) |
|-------------------------------------------|-----------------|-------------------------------------|-----------------------------------------------------------------------|----------------------------------------|
| Sore Throat <sup>5</sup>                  | Mild            | 16/73 (22)                          | 5/10 (50)                                                             | ref                                    |
|                                           | Moderate/Severe | 57/73 (78)                          | 5/10 (50)                                                             | 0.3 (0.1–1.1)                          |
| Abnormal Pharyngeal Exam <sup>6</sup>     |                 | 59/73 (81)                          | 8/10 (80)                                                             | 1.0 (0.2-5.0)                          |
| Fever <sup>5</sup>                        |                 | 27/69 (39)                          | 1/10 (10)                                                             | 0.2 (0.0-1.4)                          |
| Headache <sup>5</sup>                     |                 | 21/68 (31)                          | 0/10 (0)                                                              | No estimate                            |
| Abdominal Pain <sup>5</sup>               |                 | 18/68 (27)                          | 1/10 (10)                                                             | 0.3 (0.0-2.6)                          |
| Vomiting <sup>5</sup>                     |                 | 5/64 (8)                            | 0/10 (0)                                                              | No estimate                            |
| Activity <sup>5</sup>                     | Normal          | 29/60 (48)                          | 9/10 (90)                                                             | ref                                    |
|                                           | Decreased       | 31/60 (52)                          | 1/10 (10)                                                             | <b>0.1 (0.0-0.9)</b>                   |
| Cough <sup>5</sup>                        |                 | 20/63 (32)                          | 7/9 (78)                                                              | <b>7.5 (1.4-39.5)</b>                  |
| Nasal Congestion <sup>5</sup>             |                 | 39/65 (60)                          | 8/10 (80)                                                             | 2.7 (0.5-13.6)                         |
| One URI <sup>7</sup> Symptom <sup>8</sup> |                 | 42/65 (65)                          | 9/10 (90)                                                             | 4.9 (0.6-41.4)                         |
| Two URI Symptoms <sup>8</sup>             |                 | 17/63 (26)                          | 6/9 (67)                                                              | <b>5.4 (1.2-24.1)</b>                  |

5 <sup>1</sup>Denominator variability reflects missing symptom data for children with acute  
 6 infection; <sup>2</sup>GAS: group A Streptococcus; <sup>3</sup>OR: odds ratio; <sup>4</sup>CI: confidence interval;  
 7 <sup>5</sup>Patient/parent reported; <sup>6</sup>Presence of either pharyngeal erythema or exudates as  
 8 noted by trained research staff. <sup>7</sup>URI: upper respiratory symptom.  
 9 <sup>8</sup>Symptoms include cough or nasal congestion.

10  
11

1 **Supplementary Table 2. Comparison of Cohort 2 symptom characteristics at**  
 2 **time of illness presentation for children with group A Streptococcus**  
 3 **colonization with a new *emm*-type and children with acute infection and**  
 4 **estimation of odds ratio using two-sided Fisher's exact test.**

| Symptom Characteristics                   |                 | GAS <sup>1</sup> Carrier<br>with new<br><i>emm</i> -type<br>n/N | Acute<br>Infection<br>n/N <sup>2</sup> | OR <sup>3</sup> (95% CI <sup>4</sup> ) |
|-------------------------------------------|-----------------|-----------------------------------------------------------------|----------------------------------------|----------------------------------------|
| Sore Throat <sup>5</sup>                  | Mild            | 0/11 (0)                                                        | 16/73 (22)                             | ref                                    |
|                                           | Moderate/Severe | 11/11 (100)                                                     | 57/73 (78)                             | No estimate                            |
| Abnormal Pharyngeal Exam <sup>6</sup>     |                 | 8/11 (73)                                                       | 59/73 (81)                             | 0.6 (0.2-2.7)                          |
| Fever <sup>5</sup>                        |                 | 2/11 (18)                                                       | 27/69 (39)                             | 0.4 (0.1-1.7)                          |
| Headache <sup>5</sup>                     |                 | 3/11 (27)                                                       | 21/68 (31)                             | 0.8 (0.2-3.5)                          |
| Abdominal Pain <sup>5</sup>               |                 | 2/11 (18)                                                       | 18/68 (26)                             | 0.6 (0.1-3.1)                          |
| Vomiting <sup>5</sup>                     |                 | 2/11 (18)                                                       | 5/64 (8)                               | 2.6 (0.4-15.6)                         |
| Activity <sup>5</sup>                     | Normal          | 7/11 (64)                                                       | 29/60 (48)                             | ref                                    |
|                                           | Decreased       | 4/11 (36)                                                       | 31/60 (52)                             | 0.5 (0.1-2.0)                          |
| Cough <sup>5</sup>                        |                 | 3/11 (27)                                                       | 20/63 (32)                             | 0.8 (0.2-3.4)                          |
| Nasal Congestion <sup>5</sup>             |                 | 4/11 (36)                                                       | 39/65 (60)                             | 0.4 (0.1-1.4)                          |
| One URI <sup>7</sup> Symptom <sup>8</sup> |                 | 5/11 (45)                                                       | 42/65 (65)                             | 0.5 (0.1-1.7)                          |
| Two URI Symptoms <sup>8</sup>             |                 | 2/11 (18)                                                       | 17/65 (26)                             | 0.6 (0.1-3.1)                          |

5 <sup>1</sup>GAS: group A Streptococcus; <sup>2</sup>Denominator variability reflects missing symptom  
 6 data for children with acute infection; <sup>3</sup>OR: odds ratio; <sup>4</sup>CI: confidence interval;  
 7 <sup>5</sup>Patient/parent reported; <sup>6</sup>Presence of either pharyngeal erythema or exudates as  
 8 noted by trained research staff. <sup>7</sup>URI: upper respiratory symptom.  
 9 <sup>8</sup>Symptoms include cough or nasal congestion.

10  
11
